# Supplementary material for: Dynamic picture of the pig gut’s microbiota under normal and pathological conditions
Source: Springer Nature journal article supplement (doi:10.1186/s42523-025-00424-w), 2025-12-24
Supplement: MOESM1 [file 42523_2025_424_MOESM1_ESM.docx]

**Additional file 1**

**Dynamic picture of the pig gut’s microbiota under normal and pathological conditions**

Inés García Viñadoa, b, Federico Correa b, Paolo Trevisi b, Giuseppe Beea, Catherine Ollagniera

a *Swine Research Unit, Agroscope, Route de la Tioleyre 4, 1725 Posieux, Switzerland*

b *Department of Agricultural and Food Sciences (DISTAL), University of Bologna,* *viale G Fanin 44, 40127 Bologna, Italy*

Authors’ email: [ines.garciavinado@agroscope.admin.ch](mailto:ines.garciavinado@agroscope.admin.ch), [federico.correa2@unibo.it](mailto:federico.correa2@unibo.it), [paolo.trevisi@unibo.it](mailto:paolo.trevisi@unibo.it), [giuseppe.bee@agroscope.admin.ch](mailto:giuseppe.bee@agroscope.admin.ch), [catherine.ollagnier@agroscope.admin.ch](mailto:catherine.ollagnier@agroscope.admin.ch)

Corresponding author: Catherine Ollagnier

**Supplementary Table 1.** Ingredients and gross chemical composition of the starter diet.

|  | Starter diet 1 |
| --- | --- |
| Ingredients (%) |  |
| Barley, ground | 6,426 |
| Oats, ground | 10,000 |
| Oats flakes | 2,000 |
| Maize | 3,442 |
| Wheat, kernels | 45,096 |
| Wheat starch | 0,688 |
| Cerolac 15-2175 | 5,000 |
| Rapeseed oil | 2,500 |
| Potato protein | 8,459 |
| Soya extract | 2,011 |
| Wheat bran | 0,506 |
| Beet pulp | 6,585 |
| Apple pomace, dried | 4,000 |
| L-lysine HCl | 0,401 |
| DL-methionine | 0,013 |
| L-threonine | 0,086 |
| Monocalcium phosphate | 0,476 |
| Salt | 0,390 |
| Ca-formate | 1,000 |
| Pellan2 | 0,300 |
| ALP-S 463 Piglets | 0,400 |
| Luctarom 3 | 0,010 |
| Greencab-70-C 4 | 0,200 |
| Natuphos 5000 G 5 | 0,010 |

Diet for the piglets from 15 days after birth to 14 days post-weaning, formulated according to the Swiss feeding recommendations for pig.

2 Pellet binding aid: Pellan, Mikro-Technik, Bürgstadt, Germany.

3 Luctarom, Lucta; Montornès del Vallès, Spain.

4 Coated calcium butyrate: Greencab 70-c, Brenntag; Denmark.

5 Phytase; 500 units of aspergillus niger phytase/kg diet; 1 phytase unit corresponds to the amount of enzyme that releases 1 μmol P from 5 mM phytate/min at pH 5.5 and 37˚C.

|  | Starter diet 1 |
| --- | --- |
| Gross chemical composition analysed (g/kg as fed) |  |
| Dry matter | 887 |
| Crude protein | 170 |
| Fat | 45 |
| Crude fibre | 44 |
| Digestible energy (MJ/kg) | 14 |
| Lysine | 11 |
| Methionine | 3.1 |
| Threonine | 7.5 |
| Tryptophan | 1.9 |
| Ca | 5.8 |
| P | 4.5 |
| Na | 1.9 |
| Vitamin A (IE/kg) | 8000 |
| Vitamin D3 (IE/kg) | 1000 |
| Vitamin E | 25 |
| I (mg/kg) | 0.15 |
| Mn (mg/kg) | 10 |
| Cu (mg/kg) | 6 |
| Zn (mg/kg) | 75 |
| Se (mg/kg) | 0.20 |

**Supplementary Table 2:** Ingredients and gross chemical composition of the grower diet.

|  | Grower diet 1 |
| --- | --- |
| Ingredients (%) |  |
| Barley | 34,00 |
| Oats | 10,00 |
| Wheat | 39,48 |
| Mixed fat | 0,80 |
| Soybean extract | 9,78 |
| Dried beet pulp | 2,00 |
| L-Lysin-HCl | 0,47 |
| DL_methionin | 0,06 |
| L-Threonin | 0,12 |
| L-Valine | 0,15 |
| DCP | 0,79 |
| Lime, carbonic acid | 1,23 |
| Sodium chloride | 0,41 |
| Pellan2 | 0,30 |
| ALP-S 467 Mast | 0,40 |
| Natuphos 5000 G3 | 0,01 |

Diet for the pigs from days 73±3 to days 112±3 of age, formulated according to the Swiss feeding recommendations for pigs.

2 Pellet binding aid: Pellan, Mikro-Technik, Bürgstadt, Germany.

3 Phytase; 500 units of aspergillus niger phytase/kg diet; 1 phytase unit corresponds to the amount of enzyme that releases 1 μmol P from 5 mM phytate/min at pH 5.5 and 37˚C.

|  | Grower diet 1 |
| --- | --- |
| Gross chemical composition analysed (g/kg as fed) |  |
| Dry matter | 898.48 |
| Ash | 52.20 |
| Crude protein | 153.18 |
| Fat | 30.42 |
| Raw fibre | 40.03 |
| Digestible energy (MJ/kg) | 13.70 |
| Lysine | 9.91 |
| Methionine | 2.78 |
| Threonine | 6.12 |
| Tryptophan | 1.78 |
| Ca | 8.06 |
| P | 5.20 |
| Na | 1.66 |
| Cu (mg/kg) | 6.32 |
| Zn (mg/kg) | 27.36 |

**Supplementary Table 3:** Ingredients and gross chemical composition of the finisher diet.

|  | Finisher diet 1 |
| --- | --- |
| Ingredients (%) |  |
| Barley | 34.00 |
| Oats | 10.00 |
| Wheat | 44.72 |
| Mixed fat | 0.30 |
| Soybean extract | 5.94 |
| Dried beet pulp | 2.00 |
| L-Lysin-HCl | 0.36 |
| DL_methionin | 0.03 |
| L-Threonin | 0.10 |
| L-Valine | 0.15 |
| DCP | 0.28 |
| Lime, carbonic acid | 1.10 |
| Sodium chloride | 0.32 |
| Pellan2 | 0.30 |
| ALP-S 467 Mast | 0.40 |
| Natuphos 5000 G3 | 0.01 |

Diet for the pigs from **days 113±3 to slaughter at 140±5 days** of age, formulated according to the Swiss feeding recommendations for pig.

2 Pellet binding aid: Pellan, Mikro-Technik, Bürgstadt, Germany.

3 Phytase; 500 units of aspergillus niger phytase/kg diet; 1 phytase unit corresponds to the amount of enzyme that releases 1 μmol P from 5 mM phytate/min at pH 5.5 and 37˚C.

|  | Finisher diet 1 |
| --- | --- |
| Gross chemical composition analysed (g/kg as fed) |  |
| Dry matter | 897.00 |
| Ash | 43.13 |
| Crude protein | 139.99 |
| Fat | 25.55 |
| Raw fibre | 39.98 |
| Digestible energy (MJ/kg) | 10.24 |
| Lysine | 8.05 |
| Methionine | 2.33 |
| Threonine | 5.35 |
| Tryptophan | 1.62 |
| Ca | 6.14 |
| P | 4.14 |
| Na | 1.33 |
| Cu (mg/kg) | 6.04 |
| Zn (mg/kg) | 27.13 |

**Supplementary Table 4****:** Relative abundance (% of total; mean±SD) of mayor phyla, family and genera in microbiota samples collected across different administration time points[[1]](#footnote-2) in Study 1.

|  | T1 | T2 | T3 | T4 | T5 |
| --- | --- | --- | --- | --- | --- |
| **Main Phyla (%)** |  |  |  |  |  |
| *Firmicutes* | 94.66 ± 3.00 | 93.00 ± 2.81 | 96.74 ± 2.80 | 97.11 ± 2.57 | 96.35 ± 3.61 |
| *Actinobacteriota* | 3.59 ±0.46 | 4.13 ± 0.54 | 1.82 ± 0.27 | 1.05 ± 0.14 | 0.83 ± 0.14 |
| *Euryarchaeota* | 1.26 ± 0.67 | 2.46 ± 1.14 | 0.91 ± 0.62 | 1.03 ± 0.50 | 0.57 ± 0.15 |
| *Bacteroidota* | 0.19 ± 0.03 | 0.11 ± 0.01 | 0.08 ± 0.02 | 0.12 ± 0.02 | 0.17 ± 0.09 |
| *Cyanobacteria* | 0.14 ± 0.03 | 0.10 ± 0.04 | 0.27 ± 0.05 | 0.15 ± 0.08 | 0.06 ± 0.02 |
| *Proteobacteria* | 0.06 ± 0.02 | 0.07 ± 0.03 | 0.09 ± 0.03 | 0.44 ± 0.37 | 1.89 ± 1.21 |
| **Main Family (%)** |  |  |  |  |  |
| *Lactobacillaceae* | 46.53 ± 6.60 | 2.36 ± 0.52 | 32.70 ± 4.37 | 10.85 ± 1.49 | 27.76 ± 7.56 |
| *Staphylococcaceae* | 11.19 ± 10.67 | 0.19 ± 0.08 | 0.13 ± 0.07 | 0.12 ± 0.03 | 6.43 ± 5.98 |
| *Lachnospiraceae* | 8.51 ± 0.27 | 4.75 ± 0.19 | 5.56 ± 0.18 | 5.57 ± 0.19 | 2.33 ± 0.14 |
| *Peptostreptococcaceae* | 8.02 ± 2.99 | 4.00 ± 0.65 | 15.75 ± 5.61 | 23.74 ± 6.15 | 16.37 ± 6.90 |
| *Ruminococcaceae* | 5.74 ± 0.72 | 0.61 ± 0.09 | 4.92 ± 0.90 | 3.61 ± 0.47 | 1.44 ± 0.40 |
| *Erysipelotrichaceae* | 4.98 ± 0.76 | 26.65 ± 8.96 | 5.07 ± 1.41 | 7.02 ± 1.59 | 4.08 ± 0.40 |
| *Streptococcaceae* | 2.84 ± 0.36 | 31.06 ± 4.71 | 2.70 ± 0.74 | 7.28 ± 1.64 | 14.12 ± 4.18 |
| *Clostridiaceae* | 2.76 ± 1.28 | 0.70 ± 0.86 | 25.66 ± 7.53 | 33.65 ± 6.62 | 27.76 ± 7.56 |
| **Main Genera (%)** |  |  |  |  |  |
| *Clostridium sensu stricto 1* | 2.74 ± 1.32 | 11.15 ± 3.79 | 25.66 ± 7.62 | 32.32 ± 6.88 | 27.19 ± 7.99 |
| *Lactobacillus* | 35.87 ± 11.16 | 23.07 ± 6.81 | 26.55 ± 6.26 | 7.57 ± 2.24 | 3.68 ± 1.99 |
| *Terrisporobacter* | 7.13 ± 3.95 | 23.43 ± 11.36 | 13.47 ± 7.42 | 20.91 ± 7.61 | 14.61 ± 8.95 |
| *Streptococcus* | 2.84 ± 0.36 | 4.00 ± 0.65 | 2.67 ± 0.74 | 7.28 ± 1.65 | 14.07 ± 4.36 |
| *Turicibacter* | 2.01 ± 1.83 | 4.84 ± 3.20 | 3.81 ± 2.94 | 5.17 ± 3.17 | 3.33 ± 3.19 |
| *Limosilactobacillus* | 7.58 ± 1.68 | 5.97 ± 3.24 | 3.42 ± 1.00 | 1.36 ± 0.68 | 0.51 ± 0.42 |
| *Staphylococcus* | 11.09 ± 13.30 | 0.03 ± 0.02 | 0.11 ± 0.08 | 0.10 ± 0.02 | 6.33 ± 7.07 |
| *HT002* | 2.23 ± 0.50 | 1.36 ± 0.65 | 2.51 ± 1.19 | 1.44 ± 0.58 | 6.16 ± 5.83 |

**Supplementary Table 5:** Relative abundance (% of total; mean ± SD) of mayor phyla, family and genera in microbiota samples collected from non-infected (N-INF) and infected (INF) pigs across different administration time points in Study 2[[2]](#footnote-3).

|  | T1 | | T2 | | T3 | | T4 | | T5 | |
| --- | --- | --- | --- | --- | --- | --- | --- | --- | --- | --- |
|  | N-INF | INF | N-INF | INF | N-INF | INF | N-INF | INF | N-INF | INF |
| **Main Phyla (%)** |  |  |  |  |  |  |  |  |  |  |
| *Firmicutes* | 99.58 ± 4.30 | 91.89 ± 2.56 | 93.52 ± 2.92 | 95.51 ± 3.55 | 86.33 ± 2.25 | 92.25 ± 3.39 | 96.89 ± 5.82 | 97.12 ± 4.66 | 97.70 ± 4.42 | 97.50 ± 3.22 |
| *Actinobacteriota* | 0.34 ± 0.05 | 0.81 ± 0.14 | 1.48 ± 0.13 | 0.95 ± 0.11 | 1.28 ± 0.16 | 0.97 ± 0.13 | 0.30 ± 0.04 | 0.28 ± 0.07 | 0.89 ± 0.08 | 1.00 ± 0.12 |
| *Euryarchaeota* | 0.05 ± 0.00 | 2.00 ± 1.09 | 4.74 ± 0.90 | 2.56 ± 0.68 | 2.08 ± 0.71 | 1.39 ± 0.65 | 1.41 ± 0.43 | 1.23 ± 0.43 | 0.72 ± 0.34 | 0.96 ± 0.31 |
| *Cyanobacteria* | 0.01 ± 0.00 | 0.08 ± 0.03 | 0.016 ± 0.02 | 0.10 ± 0.03 | 0.10 ± 0.02 | 0.06 ± 0.02 | 0.03 ± 0.02 | 0.04 ± 0.02 | 0.11 ± 0.02 | 0.09 ± 0.04 |
| *Proteobacteria* | - | 2.93 ± 2.26 | 0.06 ± 0.02 | 0.73 ± 0.65 | 9.88 ± 4.60 | 5.12 ± 5.45 | 1.29 ± 0.83 | 0.95 ± 0.69 | 0.27 ± 0.07 | 0.40 ± 0.29 |
| *Bacteroidota* | - | 1.08 ± 0.08 | - | 0.09 ± 0.05 | 0.22 ± 0.02 | 0.15 ± 0.08 | 0.07 ± 0.02 | 0.32 ± 0.06 | 0.20 ± 0.01 | 0.01 ± 0.01 |
| *Fusobacteriota* | - | 0.65 ± 0.00 | - | - | 0.06 ± 0.00 | 0.01 ± 0.04 | - | - | 0.01 ± 0.00 | - |
| **Main Family (%)** |  |  |  |  |  |  |  |  |  |  |
| *Lactobacillaceae* | 65.27 ± 9.49 | 22.40 ± 3.89 | 20.23 ± 2.94 | 17.19 ± 2.89 | 19.25 ± 3.34 | 19.23 ± 3.69 | 3.88 ± 0.90 | 4.44 ± 0.74 | 14.86 ± 3.91 | 30.3 ± 5.33 |
| *Peptostreptococcaceae* | 20.61 ± 5.59 | 19.71 ± 5.49 | 28.55 ± 6.44 | 34.45 ± 8.33 | 11.24 ± 3.39 | 19.79 ± 6.39 | 17.62 ± 5.59 | 19.68 ± 5.37 | 10.40 ± 3.26 | 14.57 ± 4.05 |
| *Lachnospiraceae* | 3.59 ± 0.16 | 8.86 ± 0.36 | 4.77 ± 0.20 | 2.96 ± 0.14 | 6.61 ± 0.22 | 5.88 ± 0.48 | 1.80 ± 0.08 | 2.77 ± 0.18 | 2.07 ± 0.13 | 1.95 ± 0.14 |
| *Clostridiaceae* | 3.25 ± 1.32 | 20.88 ± 7.88 | 29.09 ± 6.69 | 28.73 ± 8.04 | 22.24 ± 5.46 | 30.51 ± 8.85 | 63.66 ± 13.58 | 54.69 ± 11.89 | 20.02 ± 4.54 | 26.16 ± 6.24 |
| *Streptococcaceae* | 2.19 ± 0.21 | 6.16 ± 2.64 | 1.29 ± 0.09 | 3.01 ± 1.57 | 13.88 ± 5.75 | 4.91 ± 2.51 | 3.46 ± 1.00 | 3.98 ± 1.30 | 35.53 ± 12.27 | 7.44 ± 1.60 |
| *Erysipelotrichaceae* | 1.60 ± 0.25 | 3.34 ± 0.46 | 3.60 ± 1.23 | 3.33 ± 1.32 | 1.62 ± 0.14 | 2.81 ± 0.61 | 3.82 ± 1.27 | 5.57 ± 1.83 | 7.32 ± 4.17 | 7.10 ± 2.89 |
| *Ruminococcaceae* | 0.90 ± 0.03 | 2.83 ± 0.28 | 1.93 ± 0.29 | 1.94 ± 0.25 | 3.11 ± 0.51 | 2.45 ± 0.48 | 0.68 ± 0.12 | 1.60 ± 0.31 | 0.71 ± 0.22 | 0.44 ± 0.08 |
| *Enterobacteriaceae* | - | 2.44 ± 3.85 | 0.11 ± 0.03 | 0.65 ± 0.75 | 9.44 ± 6.84 | 4.90 ± 9.41 | 1.10 ± 1.55 | 0.21 ± 0.29 | 0.10 ± 0.08 | 0.26 ± 0.47 |
| **Main Genera (%)** |  |  |  |  |  |  |  |  |  |  |
| *Clostridium sensu stricto 1* | 3.25 ± 1.32 | 20.87 ± 8.01 | 28.96 ± 7.05 | 28.72 ± 8.21 | 22.23 ± 5.56 | 30.47 ± 9.03 | 63.50 ± 13.85 | 54.66 ± 11.99 | 19.99 ± 4.64 | 26.15 ± 6.29 |
| *Lactobacillus* | 62.74 ± 13.63 | 18.08 ± 5.58 | 17.20 ± 4.37 | 14.93 ± 3.90 | 16.84 ± 5.15 | 16.18 ± 5.23 | 3.27 ± 1.27 | 2.83 ± 0.83 | 2.24 ± 0.61 | 5.37 ± 1.68 |
| *Terrisporobacter* | 17.31 ± 7.97 | 17.32 ± 7.52 | 25.42 ± 8.73 | 31.77 ± 10.60 | 10.17 ± 5.22 | 18.29 ± 8.11 | 14.73 ± 6.90 | 16.44 ± 6.76 | 8.11 ± 4.15 | 11.69 ± 5.03 |
| *Streptococcus* | 2.19 ± 0.21 | 6.16 ± 2.64 | 1.28 ± 0.09 | 3.01 ± 1.57 | 13.87 ± 6.00 | 4.90 ± 2.55 | 3.46 ± 1.00 | 3.98 ± 1.31 | 35.51 ± 12.74 | 7.42 ± 1.61 |
| *Romboutsia* | 2.45 ± 0.00 | 1.37 ± 0.78 | 2.44 ± 1.97 | 2.20 ± 0.95 | 0.74 ± 0.12 | 1.15 ± 0.66 | 2.71 ± 0.57 | 2.85 ± 0.60 | 1.99 ± 2.38 | 2.70 ± 1.90 |
| *Turicibacter* | 0.73 ± 0.00 | 1.20 ± 0.92 | 2.54 ± 3.60 | 2.70 ± 2.85 | 0.41 ± 0.12 | 1.56 ± 1.30 | 3.30 ± 0.93 | 4.64 ± 3.31 | 6.94 ± 9.05 | 6.70 ± 4.82 |
| *Weissella* | - | 1.19 ± 1.71 | 0.90 ± 0.37 | 0.13 ± 0.12 | 0.23 ± 0.12 | 0.43 ± 0.25 | 0.10 ± 0.10 | 0.52 ± 0.75 | 1.91 ± 1.10 | 9.88 ± 5.89 |
| *Pediococcus* | - | 0.03 ± 0.13 | 0.06 ± 0.01 | 0.07 ± 0.08 | 0.21 ± 0.25 | 1.25 ± 2.10 | 0.11 ± 0.14 | 0.47 ± 1.41 | 9.86 ± 14.51 | 14.07 ± 15.14 |

**Supplementary Table 6:** Adonis pairwise comparisons of microbiota composition determined in each segment of the SI at slaughter by group and box[[3]](#footnote-4) in Study 2, calculated using the Euclidian distances.

| Comparisons | SumsOfSqs[[4]](#footnote-5) | F.Model[[5]](#footnote-6) | r2 [[6]](#footnote-7) | *p[[7]](#footnote-8)* | *p* adj [[8]](#footnote-9) |
| --- | --- | --- | --- | --- | --- |
| **Segment 1:** |  |  |  |  |  |
| N-INF vs INF (mixed box) | 963.08 | 0.93 | 0.18 | 0.70 | 1.00 |
| N-INF vs INF | 1356.10 | 1.15 | 0.11 | 0.24 | 0.72 |
| INF (mixed box) vs INF | 1226.35 | 0.94 | 0.09 | 0.57 | 1.00 |
| **Segment 2:** |  |  |  |  |  |
| N-INF vs INF (mixed box) | 1424.65 | 1.09 | 0.18 | 0.22 | 0.68 |
| N-INF vs INF | 1807.58 | 1.36 | 0.16 | 0.08 | 0.26 |
| INF (mixed box) vs INF | 1144.91 | 0.74 | 0.08 | 0.93 | 1.00 |
| **Segment 3:** |  |  |  |  |  |
| N-INF vs INF (mixed box) | 1168.27 | 1.10 | 0.18 | 0.31 | 0.94 |
| N-INF vs INF | 1570.39 | 1.51 | 0.14 | 0.06 | 0.19 |
| INF (mixed box) vs INF | 1025.06 | 0.83 | 0.09 | 0.66 | 1.00 |
| **Segment 4:** |  |  |  |  |  |
| N-INF vs INF (mixed box) | 1254.16 | 1.42 | 0.19 | 0.08 | 0.25 |
| N-INF vs INF | 2136.61 | 1.95 | 0.16 | 0.02 | **0.07** |
| INF (mixed box) vs INF | 1081.60 | 0.89 | 0.08 | 0.60 | 1.00 |
| **Segment 5:** |  |  |  |  |  |
| N-INF vs INF (mixed box) | 1102.57 | 1.13 | 0.15 | 0.28 | 0.85 |
| N-INF vs INF | 2044.97 | 1.71 | 0.14 | 0.03 | **0.09** |
| INF (mixed box) vs INF | 1217.02 | 0.96 | 0.08 | 0.47 | 1.00 |
| **Segment 6:** |  |  |  |  |  |
| N-INF vs INF (mixed box) | 677.74 | 0.94 | 0.13 | 0.50 | 1.00 |
| N-INF vs INF | 1035.61 | 1.28 | 0.11 | 0.16 | 0.48 |
| INF (mixed box) vs INF | 973.13 | 1.12 | 0.10 | 0.28 | 0.84 |

1. T1: 52±3 days of age, T2: 70±3 days of age; T3: 83±3 days of age; T4: 110±3 days of age; T5: 126±3 days of age. [↑](#footnote-ref-2)
2. T1: 52±3 days of age; T2: 70±3 days of age; T3: 83±3 days of age; T4: 110±3 days of age; T5: 126±3 days of age. [↑](#footnote-ref-3)
3. N-INF: Non infected pigs in Mixed box, INF: Infected pigs in non-mixed box; INF (mixed box): Infected pigs in Mixed box. [↑](#footnote-ref-4)
4. SumsOfSqs = Sum of square reflecting total variance [↑](#footnote-ref-5)
5. F.Model = F test value [↑](#footnote-ref-6)
6. r2 = r-square value, reflects grouping differences, the higher the value, the higher the grouping differences [↑](#footnote-ref-7)
7. p = p value [↑](#footnote-ref-8)
8. p adj = p values adjusted for multiple comparison using the Bonferroni correction. [↑](#footnote-ref-9)
